# Supplementary material for: Drosophila lipin interacts with insulin and TOR signaling pathways in the control of growth and lipid metabolism
Source: Oxford University Press journal article supplement (doi:10.1242/jcs.173740), 2015-01-01
Supplement: jcs173740supp.pdf [file jcs173740supp.pdf]

## SUPPLEMENTARY FIGURES

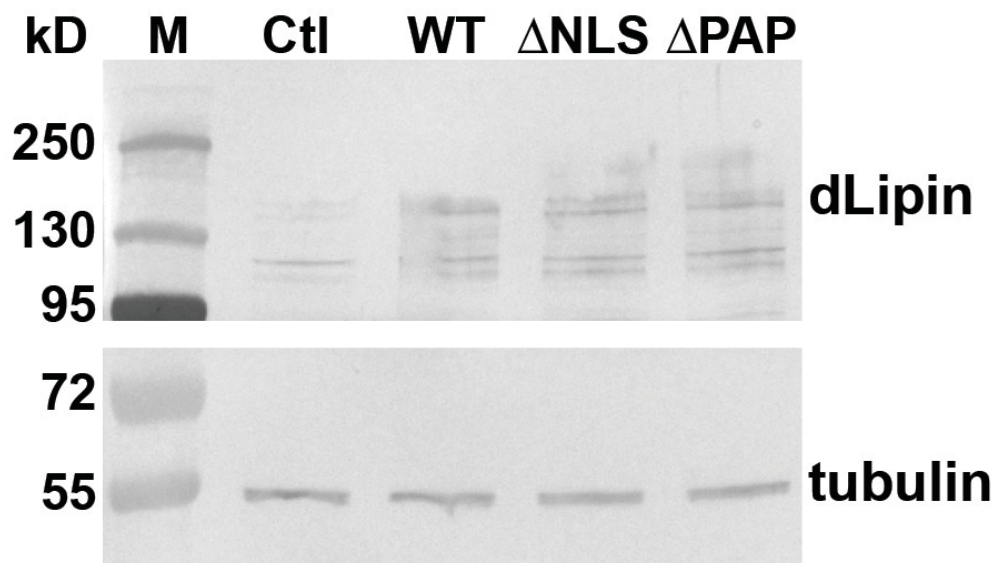

**Figure S1. Transgenic lines UAS-dLipinWT, UAS-dLipinΔNLS, and UAS-dLipinΔPAP express similar amounts of ectopic dLipin protein.** Transgenes were expressed using Sgs-GAL4 in larval salivary glands that express no or very low levels of endogenous dLipin protein (Ugrankar et al., 2011) (Ctl; Sgs-GAL4 >  $w^{1118}$ ). Tubulin was used as a loading control.

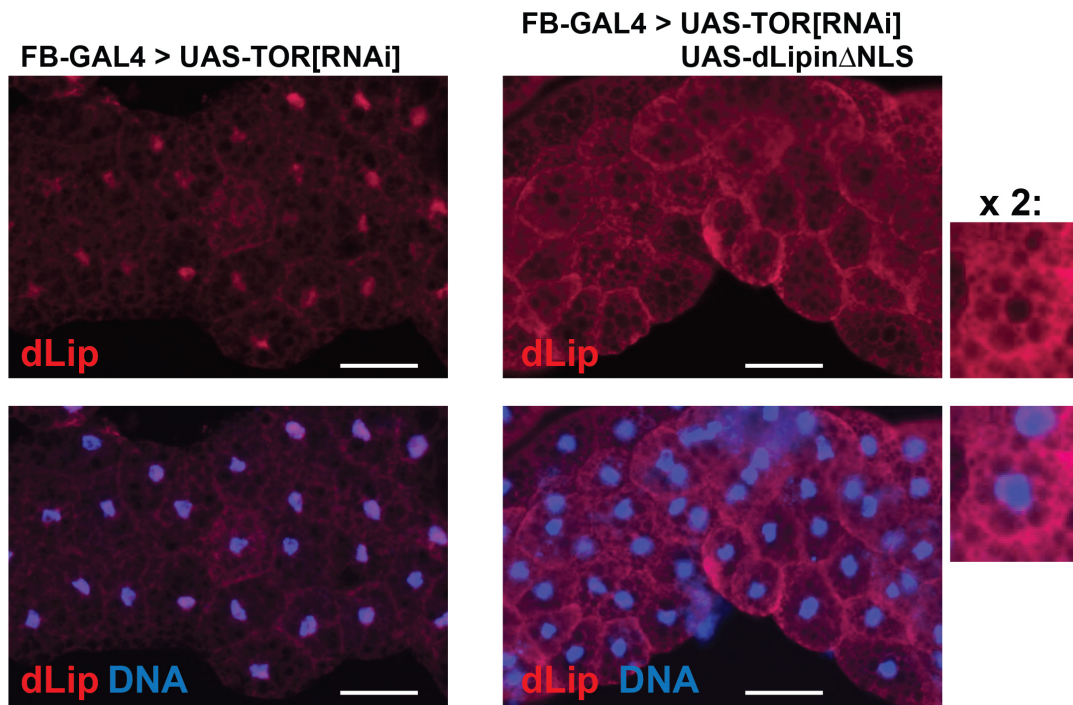

**Figure S2. dLipin $\Delta$ NLS does not enter the cell nucleus and prevents nuclear entry of endogenous dLipin.** Staining with anti-dLipin antibody (dLip, red) indicates accumulation of dLipin in cell nuclei (DNA stained with DAPI, blue) of fat body cells that lack TOR (FB-GAL4 > UAS-TOR[RNAi]). Concomitant expression of dLipin $\Delta$ NLS prevents nuclear accumulation of dLipin leading to cell nuclei that are apparently devoid of both wild-type dLipin and dLipin $\Delta$ NLS. Magnified images of one cell with and without DAPI staining are juxtaposed to facilitate visualization of nuclear exclusion of dLipin. Scale bars: 50  $\mu$ m.
